# Supplementary material
Source: publisher figshare collection journal article supplement (https://future-science-group.figshare.com/ndownloader/files/28881729)
Supplement: Supplementary file 1 [file 28881729]

**Supplementary Table 2** The subgroup analysis in hazard ratios of RFA versus SBRT.

| Subgroups | Number of studies | HR(95%CI) | Z | P | Heterogeneity | |
| --- | --- | --- | --- | --- | --- | --- |
| I²(%) | P |
| Location |  |  |  |  |  |  |
| America | 3 | 0.72(0.61,0.85) | 3.85 | 0.000 | 11.7 | 0.322 |
| Korea | 3 | 0.88(0.74,1.06) | 1.34 | 0.181 | 43.4 | 0.171 |
| China | 3 | 0.72(0.37,1.42) | 0.95 | 0.343 | 0.0 | 0.978 |
| Publication year |  |  |  |  |  |  |
| ≤2018 | 4 | 0.68(0.57,0.81) | 4.18 | 0.000 | 0.0 | 0.974 |
| >2018 | 5 | 0.89(0.76,1.05) | 1.41 | 0.157 | 0.0 | 0.462 |
| Sample size |  |  |  |  |  |  |
| <500 | 6 | 0.81(0.62,1.05) | 1.58 | 0.115 | 0.0 | 0.961 |
| ≥500 | 3 | 0.78(0.68,0.90) | 3.52 | 0.000 | 73.1 | 0.024 |
| Maximum follow-up time(months) |  |  |  |  |  |  |
| <40 | 2 | 0.78(0.43,1.40) | 0.84 | 0.399 | 0.0 | 0.983 |
| 40-70 | 4 | 0.92(0.64,1.31) | 0.46 | 0.645 | 19.6 | 0.292 |
| >70 | 3 | 0.77(0.68,0.88) | 3.84 | 0.000 | 49.6 | 0.138 |
| Median age(years) |  |  |  |  |  |  |
| <65 | 5 | 0.90(0.64,1.26) | 0.62 | 0.534 | 0.0 | 0.427 |
| ≥65 | 4 | 0.77(0.68,0.88) | 3.89 | 0.000 | 24.3 | 0.265 |
| Median tumor size  (RFA)(cm) | |  |  |  |  |  |
| <2 | 4 | 1.01(0.63,1.63) | 0.05 | 0.960 | 87.9 | 0.000 |
| ≥2 | 3 | 0.59(0.53,0.67) | 8.69 | 0.000 | 0.0 | 0.839 |
| Median tumour size  (SBRT)(cm) | |  |  |  |  |  |
| <3 | 3 | 0.83(0.58,1.19) | 1.02 | 0.310 | 49.6 | 0.114 |
| ≥3 | 3 | 0.93(0.40,2.15) | 0.17 | 0.867 | 98.1 | 0.000 |

RFA: Radiofrequency Ablation; SBRT: Stereotactic Body Radiotherapy.
